# Supplementary material
Source: Springer Nature journal article supplement (https://www.springermedizin.de/resource/supplementary/12985_2010_1145_MOESM1_ESM.pdf/9609724)

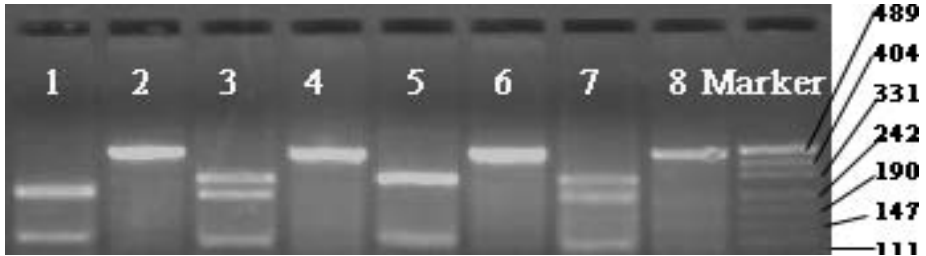

Supplement: MOESM1 [file 9609724]
